# Supplementary material for: Kinetics of α-synuclein prions preceding neuropathological inclusions in multiple system atrophy
Source: PubMed Central journal article supplement (PMC6999861; doi:10.1371/journal.ppat.1008222), 2020-02-04
Supplement: ppat.1008222.s003.pdf [file ppat.1008222.s003.pdf]

**Table S1. Semiquantitation of GCI density in MSA patient samples.**

| <b>Patient sample</b> | <b>Brain region</b>     |                      |                   |                       |
|-----------------------|-------------------------|----------------------|-------------------|-----------------------|
|                       | <b>Substantia nigra</b> | <b>Basal ganglia</b> | <b>Cerebellum</b> | <b>Temporal gyrus</b> |
| MSA14                 | Frequent                | Moderate             | Frequent          | Rare                  |
| MSA15                 | None                    | Moderate             | Frequent          | None                  |
| MSA16                 | Frequent                | None                 | Frequent          | None                  |
