# Supplementary material for: Kinetics of α-synuclein prions preceding neuropathological inclusions in multiple system atrophy
Source: PubMed Central journal article supplement (PMC6999861; doi:10.1371/journal.ppat.1008222), 2020-02-04
Supplement: ppat.1008222.s004.pdf [file ppat.1008222.s004.pdf]

**Table S2. MSA prion propagation in  $\alpha$ -syn140\*A53T–YFP cells.**

| <b>Patient sample</b> | <b>Cell infectivity (<math>\times 10^3</math> A.U.)*</b> |                      |                   |                       |
|-----------------------|----------------------------------------------------------|----------------------|-------------------|-----------------------|
|                       | <b>Substantia nigra</b>                                  | <b>Basal ganglia</b> | <b>Cerebellum</b> | <b>Temporal gyrus</b> |
| MSA14                 | 140 $\pm$ 24                                             | 44 $\pm$ 14          | 52 $\pm$ 13       | 17 $\pm$ 15           |
| MSA15                 | 260 $\pm$ 40                                             | 130 $\pm$ 28         | 120 $\pm$ 51      | 20 $\pm$ 3.7          |
| MSA16                 | 181 $\pm$ 42                                             | 83 $\pm$ 36          | 6.0 $\pm$ 1.8     | 38 $\pm$ 18           |

*\*Measurements made from five images per well, n = 6 wells. Phosphotungstic acid (PTA)-precipitated samples were diluted in DPBS 1:10 before testing on  $\alpha$ -syn140\*A53T–YFP cells.*
