# Supplementary material for: Kinetics of α-synuclein prions preceding neuropathological inclusions in multiple system atrophy
Source: PubMed Central journal article supplement (PMC6999861; doi:10.1371/journal.ppat.1008222), 2020-02-04
Supplement: ppat.1008222.s005.pdf [file ppat.1008222.s005.pdf]

**Table S3. MSA transmission to TgM83<sup>+/-</sup> mice.**

| <b>Patient sample</b> | <b>Incubation time (days post inoculation)</b> |                      |                   |                       |
|-----------------------|------------------------------------------------|----------------------|-------------------|-----------------------|
|                       | <b>Substantia nigra</b>                        | <b>Basal ganglia</b> | <b>Cerebellum</b> | <b>Temporal gyrus</b> |
| MSA14                 | 99 ± 28                                        | 88 ± 25              | 110 ± 19          | 132 ± 48              |
| MSA15                 | 106 ± 19                                       | 111 ± 22             | 94 ± 20           | 132 ± 37              |
| MSA16                 | 93 ± 24                                        | 77 ± 12              | 119 ± 32          | 109 ± 27              |
