# Supplementary material for: Kinetics of α-synuclein prions preceding neuropathological inclusions in multiple system atrophy
Source: PubMed Central journal article supplement (PMC6999861; doi:10.1371/journal.ppat.1008222), 2020-02-04
Supplement: ppat.1008222.s006.pdf [file ppat.1008222.s006.pdf]

**Table S4. MSA prion concentration in symptomatic TgM83<sup>+/-</sup> mice.**

| <b>Patient sample</b> | <b>Cell infectivity (<math>\times 10^3</math> A.U.)*</b> |                      |                   |                       |
|-----------------------|----------------------------------------------------------|----------------------|-------------------|-----------------------|
|                       | <b>Substantia nigra</b>                                  | <b>Basal ganglia</b> | <b>Cerebellum</b> | <b>Temporal gyrus</b> |
| MSA14                 | 75 $\pm$ 23                                              | 76 $\pm$ 34          | 59 $\pm$ 48       | 83 $\pm$ 43           |
| MSA15                 | 81 $\pm$ 28                                              | 93 $\pm$ 44          | 66 $\pm$ 13       | 70 $\pm$ 46           |
| MSA16                 | 59 $\pm$ 23                                              | 63 $\pm$ 30          | 95 $\pm$ 46       | 124 $\pm$ 38          |

*\*Measurements made from five images per well, n = 6 wells. Phosphotungstic acid (PTA)-precipitated samples were diluted in DPBS 1:10 before testing on  $\alpha$ -syn140\*A53T-YFP cells.*
