# Supplementary material for: Kinetics of α-synuclein prions preceding neuropathological inclusions in multiple system atrophy
Source: PubMed Central journal article supplement (PMC6999861; doi:10.1371/journal.ppat.1008222), 2020-02-04
Supplement: ppat.1008222.s007.pdf [file ppat.1008222.s007.pdf]

**Table S5. MSA transmission to TgM83<sup>+/-</sup> mice.**

| <b>Inoculation site</b> | <b>Incubation time<br/>(days post inoculation)</b> | <b>Cell infectivity<br/>(<math>\times 10^3</math> A.U.)*</b> |
|-------------------------|----------------------------------------------------|--------------------------------------------------------------|
| Standard freehand       | 166 $\pm$ 48                                       | 66 $\pm$ 27                                                  |
| Hippocampus             | 182 $\pm$ 46                                       | 82 $\pm$ 27                                                  |
| Thalamus                | 159 $\pm$ 26                                       | 68 $\pm$ 9.3                                                 |
| Hypothalamus            | 223 $\pm$ 106                                      | 73 $\pm$ 21                                                  |

*\*Measurements made from five images per well, n = 6 wells. Phosphotungstic acid (PTA)-precipitated samples were diluted in DPBS 1:10 before testing on  $\alpha$ -syn140\*A53T-YFP cells.*
